# Supplementary material
Source: Springer Nature journal article supplement (https://www.springermedizin.de/resource/supplementary/12913_2014_3538_MOESM3_ESM.docx/9533092)
Supplement: MOESM3 [file 9533092]

T1:

| Study variables | Value (%) |
| --- | --- |
| Age in years:  21-30  31-40  41-50  >50 | 208 (67.0%)  75 (24.0%)  22 (7.0%)  6 (2.0%) |
| Sex :  Male  Female | 122 (39.0%)  189 (61.0%) |
| Educational level:  Diploma and below  Degree and above | 112 (36.0%)  199 (64.0%) |
| Professional category:  Nurse  Laboratory personnel  Medical doctor  Pharmacy personnel  Health officers  Other categories | 181 (58.0%)  37 (12.0%)  28 (9.0%)  29 (10.0%)  16 (5.0%)  19 (6.0%) |
| Working experience in years:  ≤10 years  >10 years | 235 (76.0%)  76 (24.0%) |
| Monthly salary in Birr:  >2000.00  [1500-2000.00]  <1500.00 | 199 (64.0%)  87 (28.0%)  25 (8.0%) |
| Job satisfaction:  Yes  No | 146 (47.0%)  165 (53.0%) |
| Reasons for job dissatisfaction:  Poor salary  Poor opportunity for updating  Poor recognition and rewarding system  Both poor salary and poor recognition | 75 (43.0%)  52 (30.0%)  28 (16.0%)  20 (11.0%) |
